# Supplementary material for: Increased expression and accumulation of GDF15 in IPF extracellular matrix contribute to fibrosis
Source: JCI Insight. 2022 Aug 22;7(16):e153058. doi: 10.1172/jci.insight.153058 (PMC9462497; doi:10.1172/jci.insight.153058)
Supplement: Supplemental data [file jciinsight-7-153058-s300.pdf]

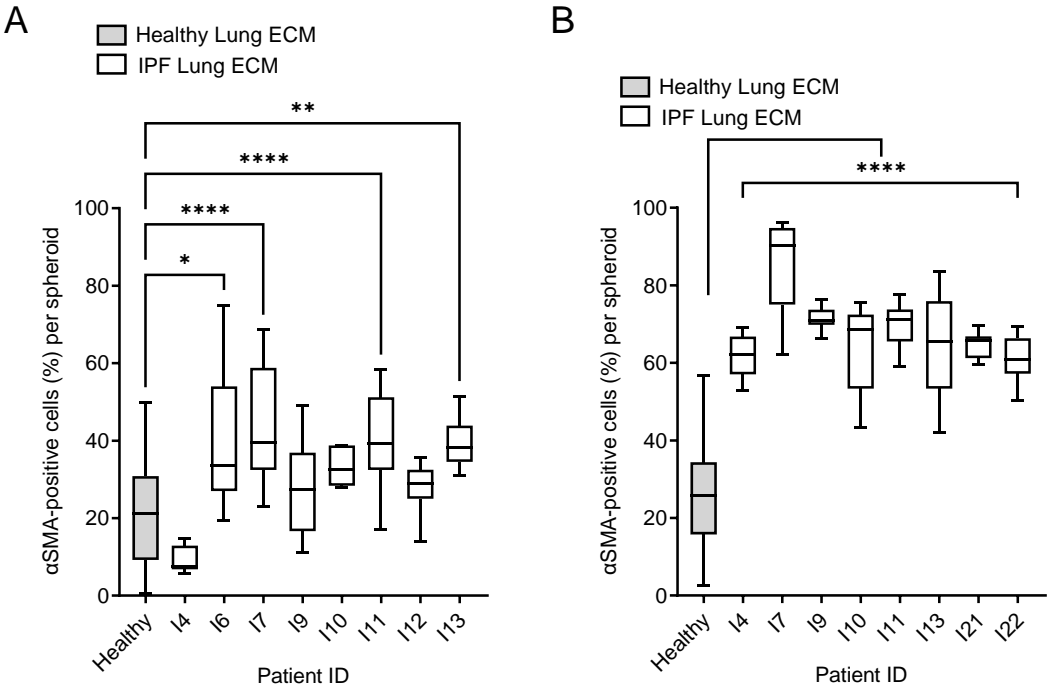

**Figure S1. Diseased lung extracellular matrix promotes fibroblast to myofibroblast transition. (A-B)** Decellularized and weight-normalized ECM generated from healthy or IPF lung tissue (n=8 donors) was co-cultured with NHLFs using 3D spheroid hanging drop system, and αSMA and nuclei were immunofluorescence labeled. Image analysis-based αSMA quantification was performed using ImageXpress Micro system and the percentage of αSMA-positive cells was calculated in each spheroid (>14 spheroids per patient, the data for the healthy group are pooled and represent the median of 8 donors) using MetaXpress High Content Image Analysis Software at day 4 (**A**) and day 8 (**B**) of culture. Data are presented using box and whiskers plots, the line in the middle is plotted at the median. Statistically analyzed with multiple Kruskal-Wallis test in comparison to healthy subjects, \*p<0.05 and \*\*\*\*p<0.0001.

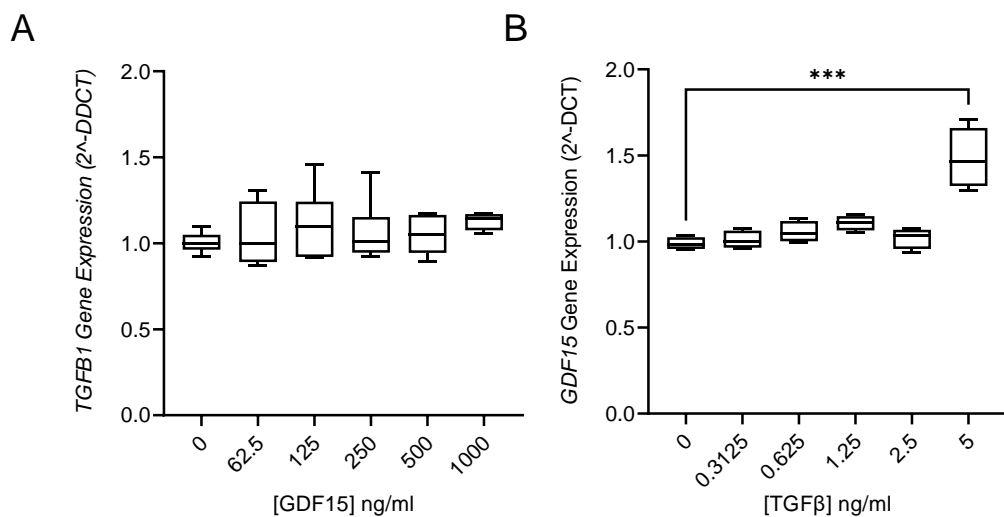

**Figure S2. GDF15- or TGFβ-induced gene expression.** NHLF were stimulated with recombinant GDF15 (125-1000 ng/ml) or TGFβ1 (0.3125-5 ng/ml) for 24 hours. Gene expression was measured by quantitative RT-PCR for *TGFβ1* upon recombinant GDF15 stimulation (**A**) and for *GDF15* upon TGFβ1 stimulation (**B**). The expression of the genes of interest was calculated after the normalization to HPRT HKG expression and versus untreated cells, shown as  $2^{-\Delta\Delta CT}$  (fold change) and presented using box and whiskers plots, the line in the middle plotted at the median. Statistically analyzed with nonparametric Kruskal-Wallis test, \*\*\* $p < 0.001$ ,  $n = 4$  biological replicates.

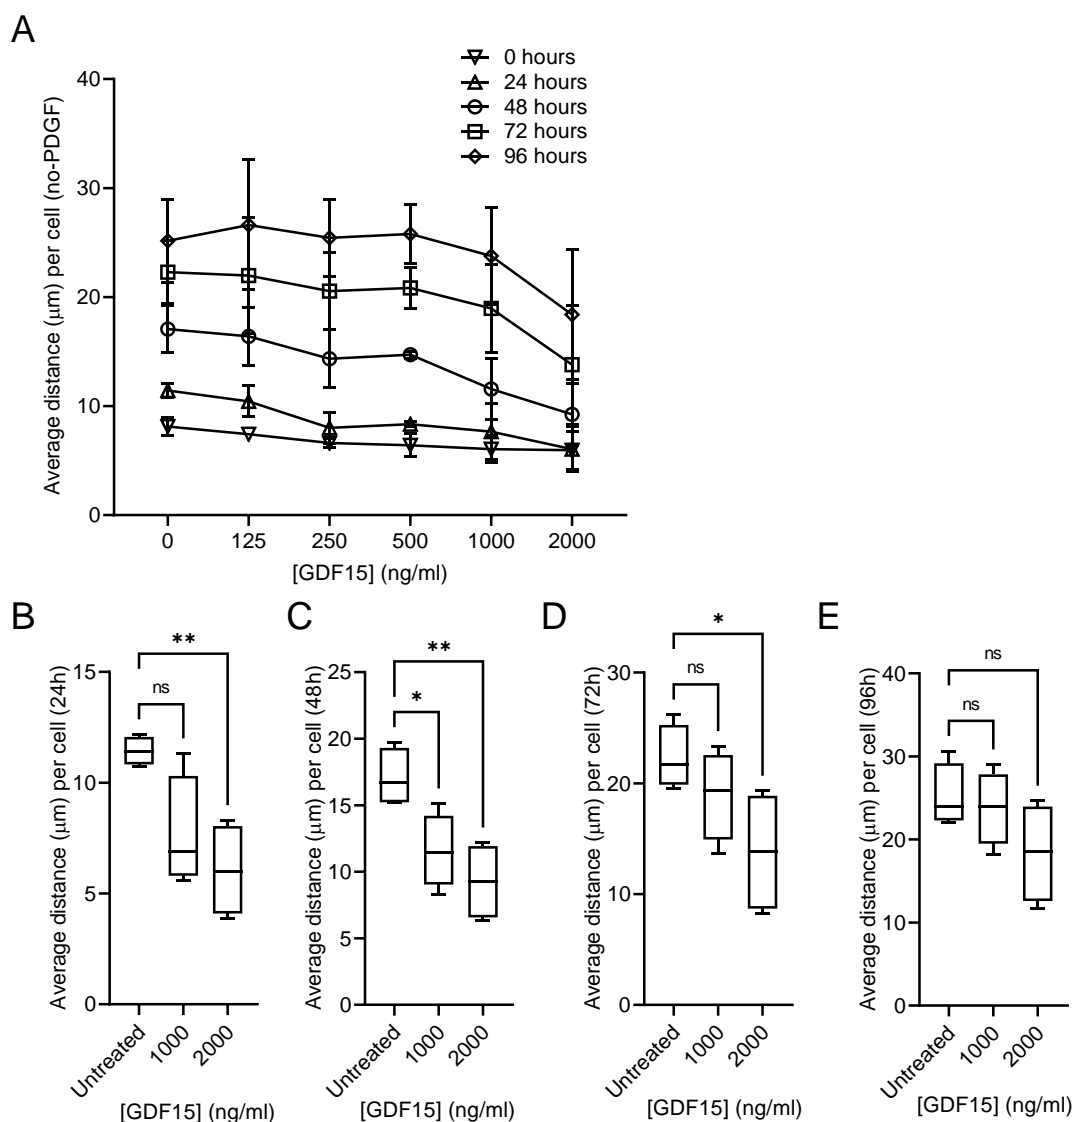

**Figure S3. Stimulation with rGDF15 leads to decreased migration of NHLF.** (A) Average migration distance of NHLF embedded in collagen gel without addition of PDGF-BB was measured with confocal live-imaging system during 24–96 hours of stimulation with rGDF15. The data are expressed as mean  $\pm$  s.d. value,  $n=3$  biological replicates. (B–E) The data were statistically analyzed at 24 (B), 48 (C), 72 (D) and 96 (E) hours of migration with multiple one-way ANOVA test, \*\* $p<0.01$ , \*\*\* $p<0.001$  and \*\*\*\* $p<0.0001$ . Data are shown with box and whiskers plots, the line in the middle is plotted at the median.

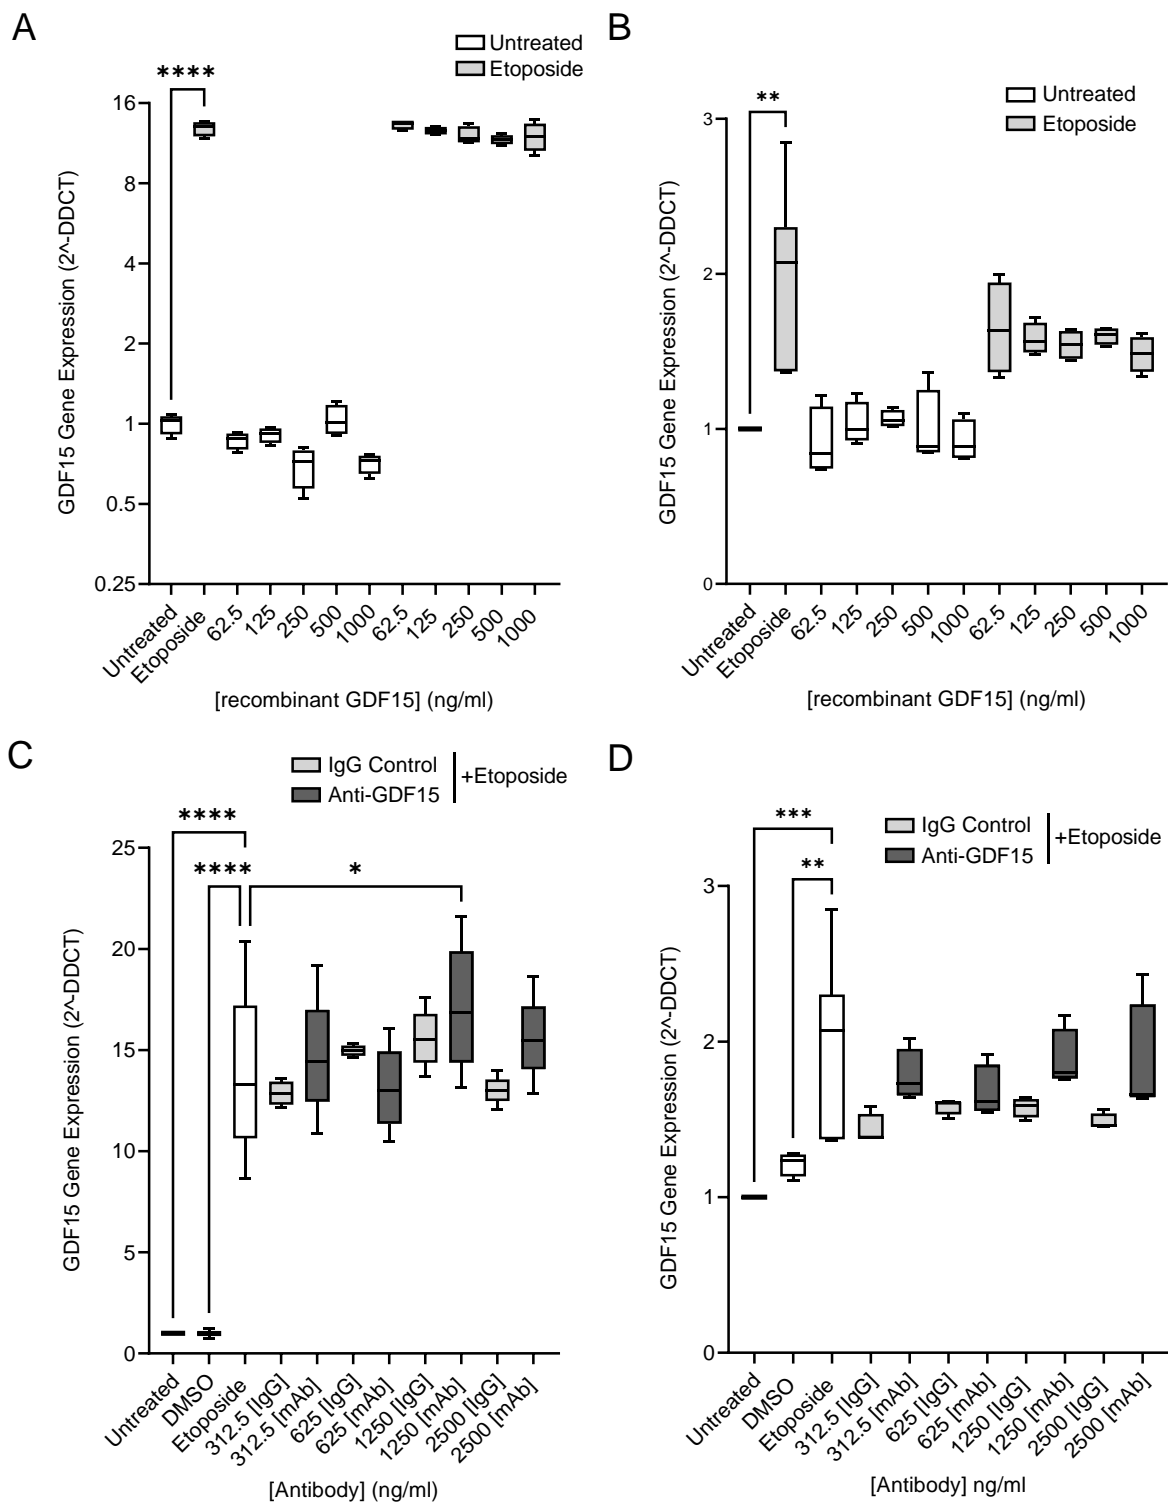

**Figure S4. Impact of cellular senescence on *GDF15* expression.** Cells were stimulated with etoposide (3 $\mu$ M) or DMSO vehicle control for 24h and pre-incubated with recombinant GDF15 (**A-B**) or with GDF15-neutralizing antibody (**C-D**). *GDF15* gene expression was measured by quantitative RT-PCR in NHLF (**A, C**) or SAEC (**B, D**). The expression of *GDF15* was calculated after the normalization to HPRT housekeeping gene expression. The data are shown as  $2^{-\Delta\Delta CT}$  (fold change over untreated cells) and presented using box and whiskers plots, the line in the middle plotted at the median. Statistically analyzed with nonparametric Kruskal-Wallis test, \* $p < 0.05$ , \*\* $p < 0.01$ , \*\*\* $p < 0.001$  and \*\*\*\* $p < 0.0001$ ,  $n = 4$  biological replicates.

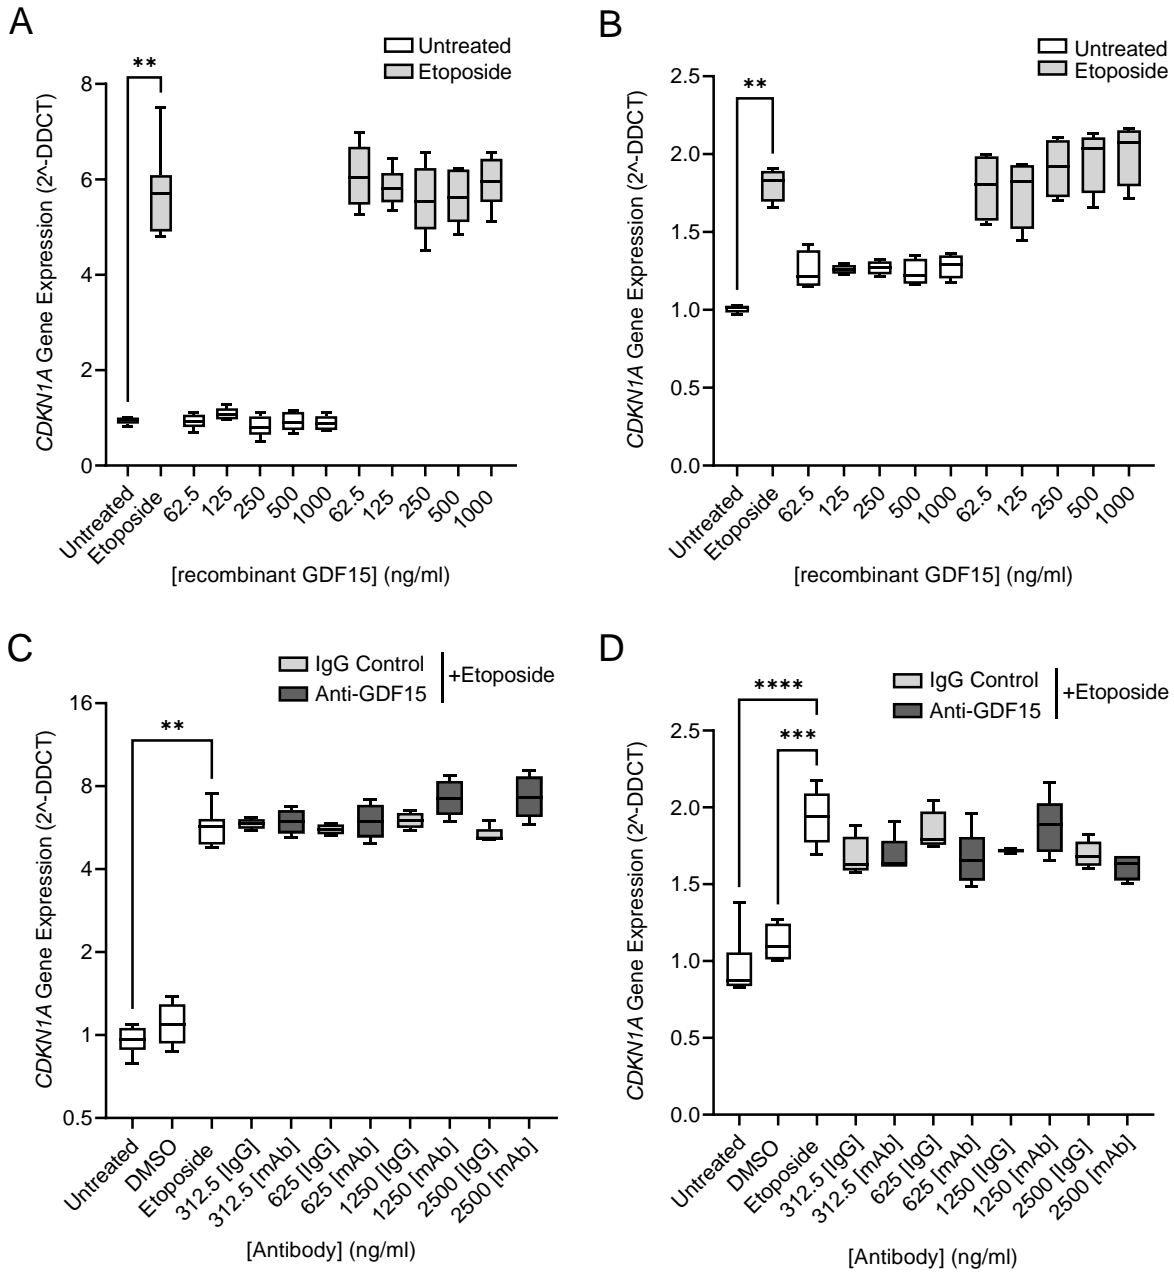

**Figure S5. The effect of GDF15 on senescence-associated *p21* gene expression.** Cells were treated with etoposide (3 $\mu$ M) or DMSO vehicle control for 24h and pre-incubated with rGDF15 (**A-B**) or with GDF15-neutralizing antibody (**C-D**). *P21* (*CDKN1A*) gene expression was measured by quantitative RT-PCR in NHLF (**A, C**) or SAEC (**B, D**). The expression of the genes of interest was calculated after the normalization to HPRT housekeeping gene expression. The data are shown as  $2^{-\Delta\Delta CT}$  (fold change over untreated cells) and presented using box and whiskers plot, the line in the middle plotted at the median. Statistically analyzed with nonparametric Kruskal-Wallis test, \* $p < 0.05$ , \*\* $p < 0.01$ , \*\*\* $p < 0.001$  and \*\*\*\* $p < 0.0001$ ,  $n = 4$  biological replicates.

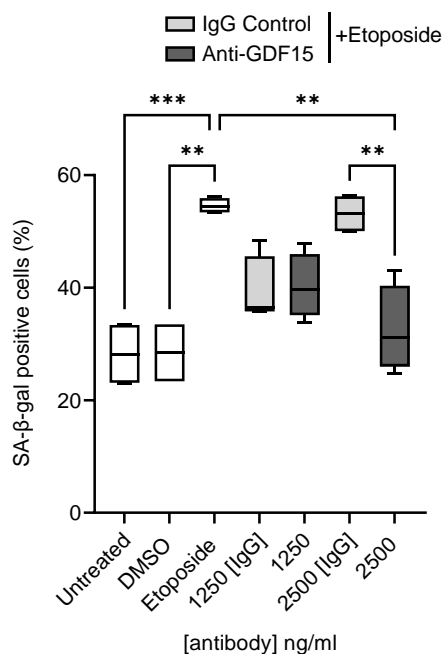

**Figure S6. The effect of GDF15 neutralization on SAEC senescence.** SAEC were treated with etoposide (3 $\mu$ M) or DMSO vehicle control for 24 hours and pre-incubated with GDF15-neutralizing antibody. Cellular SA- $\beta$ -gal was detected using Cellular Senescence Detection Kit - SPiDER- $\beta$ Gal according to the manufacturer's protocol. Data (n=4 biological replicates) are presented using box and whiskers plot, the line in the middle plotted at the median. Statistically analyzed with multiple ANOVA analysis with Tukey's post-hoc test. \*p<0.05, \*\*p<0.01, \*\*\*p<0.001 and \*\*\*\*p<0.0001.

**Supplemental Table 1** Information about patients used in the study.

| <b>Disease</b> | <b>Gender</b> | <b>Age range (years)</b> | <b>Smoking history</b> |
|----------------|---------------|--------------------------|------------------------|
| healthy        | female        | 46-65                    | non-smoker             |
| healthy        | female        | 46-65                    | ex-smoker              |
| healthy        | male          | 31-45                    | non-smoker             |
| healthy        | male          | 46-65                    | non-smoker             |
| healthy        | male          | 31-45                    | non-smoker             |
| healthy        | male          | 31-45                    | ex-smoker              |
| healthy        | male          | 46-65                    | non-smoker             |
| healthy        | male          | 20-30                    | non-smoker             |
| healthy        | male          | 46-65                    | non-smoker             |
| healthy        | male          | 46-65                    | non-smoker             |
| healthy        | female        | 31-45                    | non-smoker             |
| healthy        | male          | 46-65                    | ex-smoker              |
| healthy        | male          | 46-65                    | ex-smoker              |
| healthy        | male          | 31-45                    | ex-smoker              |
| healthy        | female        | 46-65                    | non-smoker             |
| healthy        | female        | 66-85                    | ex-smoker              |
| IPF            | female        | 31-45                    | ex-smoker              |
| IPF            | male          | 66-85                    | ex-smoker              |
| IPF            | female        | 66-85                    | non-smoker             |
| IPF            | female        | 31-45                    | ex-smoker              |
| IPF            | female        | 66-85                    | ex-smoker              |
| aIPF           | female        | 46-65                    | ex-smoker              |
| IPF            | female        | 46-65                    | ex-smoker              |
| IPF            | female        | 46-65                    | ex-smoker              |
| IPF            | male          | 46-65                    | ex-smoker              |
| IPF            | female        | 46-65                    | ex-smoker              |
| IPF            | male          | 46-65                    | ex-smoker              |
| IPF            | male          | 66-85                    | non-smoker             |
| IPF            | female        | 46-65                    | ex-smoker              |
| IPF            | female        | 46-65                    | ex-smoker              |
| IPF            | male          | 66-85                    | ex-smoker              |
| IPF            | male          | 46-65                    | ex-smoker              |
| IPF            | male          | 46-65                    | ex-smoker              |
| IPF            | female        | 66-85                    | non-smoker             |
| IPF            | male          | 46-65                    | non-smoker             |

**Supplemental Table 2** IPA analysis of all significantly enriched pathways (adj p value <0.05) based on differentially expressed proteins in IPF ECM compared to healthy ECM.

| <b>Ingenuity Canonical Pathwaysa</b>                        | <b>-log(p-value)</b> | <b>Ratio</b> |
|-------------------------------------------------------------|----------------------|--------------|
| FXR/RXR Activation                                          | 8.64                 | 0.28         |
| Acute Phase Response Signaling                              | 8.05                 | 0.181        |
| LXR/RXR Activation                                          | 7.32                 | 0.226        |
| Hematopoiesis from Pluripotent Stem Cells                   | 5.83                 | 0.714        |
| Coagulation System                                          | 5.79                 | 0.333        |
| Atherosclerosis Signaling                                   | 4.63                 | 0.189        |
| Communication between Innate and Adaptive Immune Cells      | 4.56                 | 0.28         |
| Neuroprotective Role of THOP1 in Alzheimer's Disease        | 4                    | 0.2          |
| Complement System                                           | 3.91                 | 0.226        |
| Intrinsic Prothrombin Activation Pathway                    | 3.79                 | 0.261        |
| Systemic Lupus Erythematosus Signaling                      | 3.35                 | 0.125        |
| Xenobiotic Metabolism AHR Signaling Pathway                 | 3.12                 | 0.171        |
| Allograft Rejection Signaling                               | 3.03                 | 0.238        |
| Ascorbate Recycling (Cytosolic)                             | 2.84                 | 1            |
| Primary Immunodeficiency Signaling                          | 2.82                 | 0.286        |
| Autoimmune Thyroid Disease Signaling                        | 2.59                 | 0.25         |
| Gluconeogenesis I                                           | 2.59                 | 0.25         |
| Iron homeostasis signaling pathway                          | 2.57                 | 0.125        |
| Vitamin-C Transport                                         | 2.27                 | 0.3          |
| IL-12 Signaling and Production in Macrophages               | 2.23                 | 0.121        |
| Osteoarthritis Pathway                                      | 2.18                 | 0.108        |
| Clathrin-mediated Endocytosis Signaling                     | 2.18                 | 0.0894       |
| Inhibition of Matrix Metalloproteases                       | 2.06                 | 0.182        |
| Extrinsic Prothrombin Activation Pathway                    | 2.04                 | 0.25         |
| Aryl Hydrocarbon Receptor Signaling                         | 2.03                 | 0.111        |
| Altered T Cell and B Cell Signaling in Rheumatoid Arthritis | 2                    | 0.174        |
| Putrescine Degradation III                                  | 1.94                 | 0.231        |
| Lipid Antigen Presentation by CD1                           | 1.84                 | 0.214        |
| Granulocyte Adhesion and Diapedesis                         | 1.84                 | 0.113        |
| Xenobiotic Metabolism PXR Signaling Pathway                 | 1.82                 | 0.101        |
| Tryptophan Degradation X (Mammalian, via Tryptamine)        | 1.76                 | 0.2          |
| Dopamine Degradation                                        | 1.68                 | 0.188        |
| Glutathione-mediated Detoxification                         | 1.61                 | 0.176        |
| Pentose Phosphate Pathway                                   | 1.58                 | 0.286        |
| Glycolysis I                                                | 1.54                 | 0.167        |
| Phagosome Maturation                                        | 1.52                 | 0.0825       |
| LPS/IL-1 Mediated Inhibition of RXR Function                | 1.5                  | 0.0875       |
| Noradrenaline and Adrenaline Degradation                    | 1.48                 | 0.158        |
| Leukotriene Biosynthesis                                    | 1.46                 | 0.25         |
| Choline Degradation I                                       | 1.42                 | 1            |
| Thyroid Hormone Biosynthesis                                | 1.42                 | 1            |
| Eicosanoid Signaling                                        | 1.42                 | 0.15         |
| Dendritic Cell Maturation                                   | 1.36                 | 0.0882       |
| B Cell Development                                          | 1.36                 | 0.222        |
| OX40 Signaling Pathway                                      | 1.36                 | 0.143        |
| Serotonin Degradation                                       | 1.31                 | 0.136        |
